# Supplementary material for: Effect of educational intervention on knowledge and level of adherence among hemodialysis patients – A randomized control Trial
Source: Research Square preprint supplement (doi:10.21203/rs.3.rs-1194596/v1), 2022-02-01
Supplement: Supplementary file 1 [file 1c8ee4cf820f0cb3da213c2f.docx]

**“Effectiveness of a modular educational intervention on patient outcomes among maintenance** **hemodialysis patient in southern Karnataka “– A randomized control trial**

***Ph.D. Proposal submitted***

*To*

**Manipal University**

*By*

**Bryal D'souza**

Assistant Professor, Dept. of Public Health, Manipal University

*Under the Guidance of*

**Dr Ravindra Prabhu** (Guide) **Dr B Unnikrishnan** (Co-Guide)

Professor and Head, Associate Dean & Professor

Dept. of Nephrology Dept. of Community Medicine

KMC, Manipal KMC, Mangalore

**
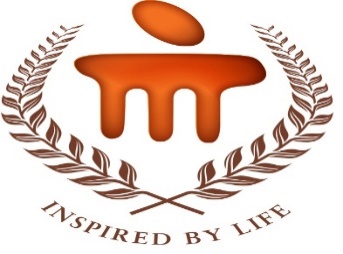
**

**MANIPAL UNIVERSITY**

# INTRODUCTION TO THE PROPOSED RESEARCH

Chronic kidney disease (CKD) is a chronic condition and a leading global health problem characterized by gradual loss of kidney function. It is globally emerging to be an important chronic disease, Diabetes and hypertension today account for 40–60% cases of CKD in India. 1

As per the Indian council of medical research, the prevalence of diabetes among Indian population has risen to 7.1%, and amongst the urban population above the age of 40 tears as 28 %. 2, 3

In India, given its populace >1 billion, the rising rate of CKD is very likely to posture real issues for the human services and the economy in future years. The age-adjusted incidence estimation of rate of ESRD in India to be 229 per million population (pmp) 3, nearly >200,000 new patients every year enter renal replacement in India and only 10 % actually receive some form of renal replacement. 4

Chronic kidney disease has a highly globally prevalent disease and the estimated global prevalence is between 11 to 13 %, stage 5 being in the majority *5,* nearly 10 % of the population is affected worldwide but CKD and every year millions die because of inaccessibility and unaffordability of treatment. 6

Across the world nearly 1.9 million patients go through go through renal replacement therapy, with continued use at 316 per million population and annual initiation of 73 per million population (31.6 per 100,000 and 7.3per 100,000). 7

In India, Modi et al. calculated average crude and age-adjusted incidence rates for ESRD of 151 and 232 per million population (15.1 per 100,000 and 23.2 per 100,000), respectively. The mean age was 47 years, and 58% were males.8 Maria Nares et al in their systematic review of 32 studies found incidence rates of ESRD due to diabetic nephropathy to vary from 38.4 to 804.0 per 100,000 person-years. A minority of CKD patients reach ESKD (0.15–0.20%/year over next 10–25 years). This population is 10–100 times vulnerable for cardiovascular (CV) events.9

Chronic kidney disease can be classified into different stages depending on the glomerular filtration rate. These stages are stage 1, 2, 3, 4 and 5th stage being the end stage with eGFR less than 10 percent which requires patients to be on maintenance hemodialysis.

**Prevalence of chronic kidney disease in India and South India**

Studies done my Agarwal et al. and Varma et al. in Delhi using the criteria of Creatinine >1.8mg/dl on two occasions 8-12 weeks apart and Albuminuria >30 mg/dl or albuminuria /creatinine ratio>30and/or GFR <60 ml/min respectively in each of the studies the stage and prevalence were 0.785 % and 13 % respectively. Singh et al had screened 6120 Indian subjects from 13 academic and private medical centers all over India and the prevalence of CKD was 17.2% with ~6% have CKD stage 3 or worse. 10

A door to door screening of 2091 people in Shimoga, Karnataka using MDRD equation and Cockcroft – gault equation the prevalence of CKD was 16.4 % by CGBSA method and 2.8% using the MDRD equation. 11

The population of Karnataka is 66,70,9129 of which 5, 33,673 ESRD patients require dialysis. When compared to 2016 it was 5, 25, 962 and 5, 18, 362 in 2015. 12

Intra dialytic complication, vascular access complication, infections, deranged biochemical variables and electrolyte imbalance. The common intradialytic complications are 1. Hypotension (70-80%), 2. Muscle Cramps (60-80%), 3. Disequilibrium syndrome (50-60%), 4. Nausea and vomiting (50%), 5. Headache (50-60%), 6. Chest pain (45-50%) 13, the most common complications among maintenance hemodialysis is stenosis and infections. 14

The leading comorbidities among ESRD patients is hypertension , diabetes and disorders of the cardiovascular system , improving quality of RRT and better understanding and managing of comorbid conditions by patients are detrimental to improve the outcome among ESRD patients. The most common cause of morbid conditions and death among ESRD patients are cardiovascular diseases. 15

Majority of the patients according to a review of 29 published dietary intake studies on maintenance dialysis patients were unable to meet the recommended daily dietary protein /energy intake and wide variation in meeting the required recommendation, evidence of muscle wasting is seen among 18 – 75% of patients with CKD, undergoing maintenance dialysis therapy. 16, 17 Patient’s knowledge regarding care of kidney disease and hemodialysis care will help them to be better informed about the disease and is an important factor in improving adherence to treatment. Accurate and permanent education regarding the knowledge about diet, complications of hemodialysis and prevention, care of comorbidities can increase their self-care ability, health literacy, and adherence. 18

Many research investigations findings demonstrated that when Pre ESRD patients are better aware of their disease through educational intervention or forms of instructive mediation they show better adherence to diet , medication , treatment regimen , improved quality of life and improved clinical outcomes compared to patients under standard care.

In this randomized controlled trial, we will assess the effectiveness of educational intervention in improving the level of adherence, knowledge, medical service utilization, cost and quality of among ESRD patients on maintenance dialysis.

# REVIEW OF LITERATURE

## 2.1 Knowledge on care of kidney disease

In a study done in Mangalore to test the effectiveness of a nurse-led program among 50 hemodialysis patients, showed an improvement in knowledge of self-care management from 38 (76%) to 48 (96%), this study also resulted that patients were not aware of self-care management because they lack the knowledge of performance. 19

Similarly, a cross-sectional study in Bangalore on knowledge, attitude, and behavior among hemodialysis patients showed knowledge level of >75% and inadequate behavioral level <50 % towards therapeutic regimen. the study also suggest that there is a need for consistent monitoring and repeated nutritional intervention to improve the behavior to the renal dietary regimen, In Punjab 50 % of the hemodialysis patients had poor knowledge and attitude and a positive correlation between knowledge and attitude i.e., with an increase in the knowledge there will be a positive attitude towards self-care. 21

In a quasi-experimental at the USA, the effect of education on diet and patients knowledge among hemodialysis patients was studied. The intervention of sessions for 20 to 30 minutes had improved the phosphorous level and knowledge which further improved in the next six months, no difference in serum calcium and serum PTH levels were seen in the two groups. 22

A cross-sectional study to evaluate the effect of knowledge, patient’s attitude and practice on self-management among dialysis patients in Iran, face to face interviews and validated questionnaires were used as a tool. A significant correlation between patient’s knowledge and practice. Patients KAP scores have a useful effect upon self-management behavior, similar in Brazil 97.7% had inadequate knowledge on care of kidney disease and self-care practice with the fistula was inadequate in 97.7% of patients. 23

A descriptive exploratory study was done among 100 hemodialysis patients in Kathmandu on self-care knowledge .semi structured interviews and face to face interview were done. 54 % i.e., majority of the patients had poor knowledge and 46 % had good knowledge about self-care management. Mean knowledge for weight monitoring was 90 %, fistula is 86.36 %, diet 80 %, exercise and blood pressure monitoring was 75 %. It was recommended that patients with chronic kidney disease on requiring an educational intervention imparting knowledge on blood pressure and weight monitoring, exercise and fistula care. Morbidity can be reduced with an educational interventional for hemodialysis patients.24

A self-care assessment study using a questionnaire in Marag-heh, Bonab and Miandoab Hospitals among 115 dialysis patients had shown 78.3% had desirable self-care ability. the highest being in vascular access (73%) and undesirable in following diet. the study recommends that there is a need to enhance the knowledge on diet, complications and preventive methods though accurate education to increase their self-care ability.25

Finkelstein et al. in their study among pre-ESRD patients observed that 35% of them were unaware of any treatment modality for ESRD. Forty-three percent were unaware of hemodialysis, 56% were unaware of transplantation, 57% were unaware of continuous ambulatory peritoneal dialysis and 66% were unaware of automated peritoneal dialysis*.* With the worsening of the condition of the patient the patients understanding of kidney diseases would improve, the reason being the increase in contact with the nephrologist for their condition only when it was symptomatic. Patients with lower scores on quality of life were strongly associated with higher risk of hospitalization and death. Upon stratification of the pre-ESRD patients by the stage of CKD and the frequency of nephrology visits, the knowledge of these patients about the different treatment modalities improved. This seems to suggest a positive correlation between the worsening of a patient’s condition and an improvement in the knowledge and understanding of kidney disease. This could be attributed to an increase in the frequency of nephrologist consultations. Low scored on quality of life were strongly associated with death and increased in hospitalization events. 26, 27

## Nutritional status among ESRD

A finding from a review of 29 published dietary intake studies among patients on hemodialysis was that a significant variation existed in the capacities of the patients in attaining their recommended nutrient requirements. The majority of hemodialysis patients were seen to be unable to meet their recommended daily protein and/or energy intake. Evidence of wasting was observed in between eighteen and seventy five percent of hemodialysis patients. 28, 29

In order to improve the success of hemodialysis and improving outcome of the patients undergoing it is important to increase the patient's nutritional education - 2006 clinical practice guidelines and recommendations. 30

Complications among ESRD patients are characterized by uremic malnutrition, suboptimal nutrition status resulting in reduction in body weight, depleted fat stored, decreased muscle ass due to loss of somatic protein, and low levels of visceral proteins, s-albumin, pre-albumin, decreased or increased levels of calcium and phosphorus level. 31

Malnutrition can contribute to mortality among dialysis patients, the major causes of malnutrition in metabolic acidosis, restricted diet, loss of appetite as a side effect of the drugs, uremia leading to anorexia, chronic volume overload, dialysis and presence of acute and chronic systemic disease causing inflammatory responses. 32

According to an update by Yashpal Jadeja et al. Gujarat on Protein-energy wasting in chronic kidney disease, protein energy wastage can be mitigated with an appropriate and adequate diet plan and nutritional support targeting the protein intake in diet. 33

## ADHERENCE TO THERAPEUTIC REGIMEN AMONG ESRD

In a study by Sontake, 2015 among 150 patients they evaluated the medication adherence and studied the factors affecting non adherence.The level of adherence was 34%. The factors contributing to non-adherence were: 1. High medication cost (21.3%), 2. Dosing schedule complexity (20%) 3. Fear of adverse effects (16%), 4. A lack of awareness of the importance of taking each medicine (68%). 22 Similarly, a systematic review studied the contributing factors for non-adherence among \as patient factors like age, gender, education, income status, social support pathophysiological factors like muscle cramp inter dialytic complication, health system factors such as availability and accessibility of dialysis centers. 34

Jawadagi et al. observed that the level of knowledge of dietary regulations among CRF patients on hemodialysis was only average. He also observed that adequate levels of patient knowledge did not ensure compliance with the dietary regime. 35

Study: Hala I. Abo Deif1 Khiria Elsawi studied the effectiveness of a 6-month educational intervention among 60 male and female hemodialysis patients on the adherence to the therapeutic regimen. The post total mean knowledge scores of the study and the mean adherence scores had increased significantly. The study also explored the factors for non-adherence: low blood pressure (50%), cramps (23.08%), fatigue (19.23%), clots in access site, nausea, vomiting, diarrhea before or on treatment, high or low blood pressure, itching, hunger, muscle cramping, the need to use the bathroom after the treatment begins, and discomfort of venipuncture and repeated venipuncture. It was observed that an increased frequency of contact with renal nurses helped patients develop problem-solving skills, set goals and manage their disease better. It was observed that personalization of the educational approach, wherein there was an acknowledgement of the individual patient’s uniqueness in terms of her cultural background, beliefs, behaviors, feelings, economic condition, and knowledge of disease treatment, resulted in better self-management. 36

## EFFECT MULTIDISCIPLINARY EDUCATION ON PATIENT OUTCOMES OF CKD

A multidisciplinary education for CKD and ESRD includes an interdisciplinary and integrated care approach including nephrologist, dietician, pharmacy regimen, nursing, psychologist and social worker, transplant team focusing on transplantation for patients, different renal replacement therapy (RRT) modalities, dietary counseling, early vascular access placement, medication adherence and education, psychological and social care, advance care planning, treatment options, transplant coordination, infection control and patient safety during dialysis.

The effect of a Multidisciplinary Care Program for Advanced Chronic Kidney Disease in Taiwan among 1382 chronic kidney disease patients by evaluating the effect on renal outcome and patient survival. These 1382 patients were divided into MDC (592) group and non-multidisciplinary group (614) who didn't receive any intervention. The outcomes were that there was a slower eGFR in MDC(−2.57 vs −3.74 mL/min/1.73 m2), lesser emergent start of dialysis, no difference was seen in the all-cause mortality, Favourable changes in Hb, calcium, urine protein-creatinine ratio, no difference in BP change, fewer Cardiovascular events and lower annual medical cost and hospital utilization. 37

Medical cost lowered (9147.6 USD vs 11190.6) among patients who received a Multidisciplinary Predialysis Education intervention program by Yu –Jen Yu. The total medical costs and inpatient costs reduced of the first 6 months of dialysis in incident hemodialysis, fewer length of hospitalization (0 (15) vs 8 (27) days, fewer outpatient visits (15.1vs 17.9). however the cost of outpatients service did not differ between the groups. 38

Lee et al. observed that there was a stronger likelihood of adherence to treatment guidelines by patients following a renal nurse practitioner working on a protocol than there was of patients following nephrology trainees. This effectiveness was seen through their study where it was compared between patients visiting a trained renal nurse practitioner versus nephrologist in renal hypertension clinic, upon initiation of dialysis it was observed that patients who followed the CKD clinic had higher hemoglobin and serum albumin concentrations however no difference in calcium and phosphorus was seen , permanent vascular access among CKD patients following CKD clinic, no significant difference in all cause hospitalization. 39

A study by Elizabethand Bharathi to study the effect of multidisciplinary team to slow the rate of decline in CKD , they used a 4 year old historic cohort, where they compared 1769 persons under usual nephrology care versus 233 under MDT care containing a nephrologist, pharmacist, dietician, diabetes educator, dietician and social worker. A slower rate of decline of GFR was seen 1.2 versus 2.5 ml/min per 1.73 m2 for usual care, however no difference between biochemical variable outcomes between the groups were seen. Patients following a multidisciplinary team care had an average fewer chronic conditions and hospitalization 76(32.62) vs 716(40.47). They also had a lower rate of primary care visits 229 (98.28) vs 1,710(96.66). 40

Dhurati Golemi et al. in Albania similarly compared the effectiveness of multidisciplinary education versus control group with standard care among pre ESRD patients and found that dialysis was initiated in 11.7 % in MPE group and 25 % in non-MPE group which showed that patients who were under the multidisciplinary group had slower renal decline and mortality was 1.7% in the MPE and 8.3% in non-MPE groups showing higher mortality in the non-recipient group. 41

## Medical expenditure and utilization

Diabetic patients with pre ESRD condition spent more per hospitalization than compared with patients without any complications, median was INR 12,664 (range: ₹ 4465-57,400) versus 3,214 ₹ (USD 69) and cost for a person on hemodialysis is four times higher than for persons with CKD 42 hospitalization rates were higher during the first three months of dialysis because of delayed referral to nephrologist, lack of permanent access and infections. Post dialysis during the later stages major causes or hospitalization were access related 36%, cardiovascular diseases 22%, gastrointestinal diseases 11%, access related infections, other infections that are not related access 10 % and other causes 22%. 43

The average expenditure on hospitalization, including for those who were never admitted, was 7,260 ± 8,838 euros/ per patient year. The median expenditure on hospitalization was reduced to 4,335 euros/patient year. The expenditure ranged from zero for those never admitted to 51,779 Euros. The outpatient cost accounted for 3% of the total cost of treatment. Comorbid conditionsin individuals were seen to be potential cost drivers. At the same time, comorbid conditions were also seen to be potential sources of substantial savings in cost*.*43

## Quality of life

Sathwik et al. found thequality of life among hemodialysis patients to be significantly impaired than in comparison to the QOL of healthy individuals. This was especially so with respect to the physical, psychological, and social relationship domains. This was not true for the environmental domain*.*44

The impact of counselling on quality of life of chronic kidney disease among hemodialysis patients in Bangalore among hemodialysis patients resulted in improved social functioning, emotional, mental and self-evaluation parameters. 45

# Research Gaps

1. Limited literature regarding the knowledge on care of kidney disease and hemodialysis care among patients on hemodialysis.
2. Cost of a multidisciplinary approach is a challenge in a limited resource setting and also a additional cost factor for patients.
3. There is paucity of literature and research regarding the effect of Multidisciplinary educational intervention on patient outcomes among ESRD patients in India.
4. Limited data regarding the effectiveness of MDC from the available RCT studies outside India.
5. Results of most of the studies conducted outside India may not be relevant/extrapolated to the Indian scenario.
6. Studies have shown a wide variation in the level of adherence & factors determining the adherence to CKD therapeutic regimen, knowledge on care of kidney disease and patient dialysis knowledge, medical utilization and expenditure among CKD patients.
7. Need for a sustainable model.

# AIMS OF THE STUDY

1. To assess the effectiveness of a multidisciplinary educational intervention on patients outcomes (adherence, knowledge on care of kidney disease and hemodialysis care, medical service utilization and expenditure).

# OBJECTIVES OF THE STUDY

1. To assess the knowledge of kidney disease and hemodialysis care among maintenance hemodialysis patients
2. To assess the adherence level and factors associated with it among maintenance hemodialysis patients
3. To develop and validate the multidisciplinary educational module
4. To test the effectiveness of the modular educational intervention on patient outcomes

## **HYPOTHESIS**

There will be a significant difference across the time (pre-test & post-test) & across the groups (Intervention and Control) with regards to patient outcomes.

# METHODOLOGY:

**Background information of the study area:**

Manipal is a suburb within the city of Udupi in Karnataka and is administered by the Udupi City Municipality with a population of 34,369 people according to the 2011 census of India. The dialysis center of Kasturba hospital caters to 200 maintenance hemodialysis patient in a month. On an average 60 new inpatient and outpatient dialysis are initiated every month and nearly 15 patients continue the sessions in the dialysis center at Kasturba hospital.

**Study settings:**

1. Dialysis unit of Kasturba hospital, Manipal

**Study design:** Study will be conducted in 3 phases:

**PHASE 01: Quantitative and qualitative**

*Cross-sectional study and focus group discussion*

- To assess the level of knowledge on care of kidney disease, hemodialysis care, self-care management and adherence level among maintenance hemodialysis patients
- Focus group discussion among patients and primary care givers to study the factors related to adherence among patients on hemodialysis

Knowledge questionnaire was developed based on kidney disease outcomes quality initiative, literature survey and inputs from specialist, followed by content validation by nutritionist, nephrologists and public health expert. Focus Group Discussion will also be done to collect additional information on factors influencing adherence and non -adherence among patients on dialysis.

The questionnaire used for the cross-sectional study is a screening tool for the trial. Patients with less than 50 % knowledge will enter the trial. Each right answer would receive a score of one and wrong answer zero. Good, moderate, poor knowledge was determined based on percentile for each of the knowledge domains

**PLAN FOR FOCUS GROUP DISCUSSIONS (FGDs):**

FGD guide will be prepared in English & translated to local language (Kannada). FGDs guides will be prepared in tune with objectives of the study. Two FGDs will be conducted, one with patients and the second with the primary care givers.

**In Focus Group Discussions (FGDs):** 2 Focus group discussion will be conducted in 2- sessions, one session with patients and the other with primary care givers.

The broad themes identified for factors affecting adherence are types of non-adherence , factors contributing to non-adherence-patient factors, health care system , psychological , therapy related , disease related ,overcoming adherence issues and other issues as identified in phase 1

**CONDUCTION OF FGDs:** FGDs will be conducted in a closed calm room where the privacy will be maintained. There will be one facilitator to conduct, one recorder to note down the discussion during FGD & one observer to make socio-gram during FGD. All the FGDs will be recorded using voice recorder. The duration of FGDs will range from 40-45 minutes per FGD.

.

**PHASE O2: Module development**

In-depth interview with experts of various discipline and inputs from National Kidney Foundation Kidney Disease Outcomes Quality (KDOQI) guidelines and literature to develop the multidisciplinary education module.

MDE educational intervention modules will be developed & validated before implementation.

The broad areas of the content of the module are as mentioned below through literature review and experts opinion. Any additional areas as identified through the earlier phase will be incorporated.

**Modules of MDE**

- Basic information about Chronic kidney disease, ESRD, RRT modalities
- Complications of ESRD and hemodialysis and its management
- Management of comorbidities
- Nutrition, dietary principles and its importance of adherence in CKD
- Pharmaceutical regimen and its importance of adherence
- Vascular access- care of vascular access & infection prevention
- Patient safety in hemodialysis
- Biochemical variables and monitoring
- Lifestyle modification
- psychological and social care to help patients protect their health & live healthier lives
- Patient self-management

**PHASE O3: Randomized control trial**

Single label trial-2 arm

- Health care provider administered group
- Control group
- Block randomization technique
- Allocation concealment
- Outcome assessment blinded

To find out the effectiveness of multidisciplinary educational intervention module on patient outcomes (knowledge, adherence, medical service utilization and cost).

Content validity of the module will be done before implementation. Focus group discussion with experts for content validation. The module will consist of the following sub modules.

**INTERVENTION PROCEDURE**:

MDE modules will be developed based on the findings from:

1. Cross-sectional study
2. In-depth interview with subject experts
3. Focus group discussion &
4. Inputs from DOQI guidelines

Nurses and dialysis technicians will be trained on the modules, pretest and posttest will be done and a training assessment using simulation and objective structured examination of the health care providers post training will be done to assess the efficacy of module delivery and work place assessment will be done to ensure the delivery of the module, training feedback will be collected

Patients for the randomized control trial will be selected as per the inclusion and exclusion criteria and those patients with knowledge cutoff less than 50%. Sample size for theRCT is 80 in each arm with 20% dropout rate included.

The module will be administered one to one session by the nurses using computer accessed audio-visual interactive sessions of one hour each, two sessions a month i.e. one session in 15 days. Patients will also be provided with education material and handouts.

10 sessions will be provided of 30 min duration of each (two sessions in a week) during dialysis. Self-inspection tool will be taught to patient to be used and maintained at home. This tool will consist of a daily health diaries to record body weight, heart rate, blood pressure, respiratory volume and food frequency recall. Kelman’s change of attitude theory will be used to facilitate and conduct discussions every two weeks.

Food frequency recall, self-inspection tool and individualized diet plans will be given to patients

The pretest and posttest questionnaire will developed based on the module and will be validated First Post-test will be done at the end of 6 month (after intervention) and patients will be followed-up for 6 months & again second post-test will be done to measure the study outcomes at the end of 12 months. During the post test, same questionnaire which will be used to measure baseline data (pretest) will be used. Outcome assessment will be blinded.

During the follow up period medical records of the patient will be analyzed for medical service utilization and cost computation. Patients missing one session will be contacted & will be asked to re-appear for the session. Subjects missing two or more sessions will be considered as drop outs.

Patients participating in both the groups will be receiving standard patient care available at the dialysis center.

**Diagrammatic representation of the study phase**

**PHASE 01: Quantitative and qualitative**

**Cross-sectional study and focus group discussions**

Assessing the Knowledge and adherence level and factors affecting adherence

Tools : Kiks questionnaire , KD-AD –adherence , FGD tool

**PHASE 02: Module development**

**In-depth interview, capacity building, Developing MDE module & training based** on Inputs from DOQI guidelines and in depth interview with experts of inter disciplines – nephrologist, dietary, pharmacy, social work /clinical psychology

**PHASE 03: Interventional study: RCT**

**RCT to implement and test the effectiveness of MDE**

1. Collection of baseline data and assessing the knowledge and adherence level,
2. Individual one to one lecture and reinforcement , Food frequency recall and medication reconciliation, diet plans , self -inspection tool , pamphlets

3. Reinforcement

4. Reassessment of knowledge and adherence at the end of reinforcement

6.Follow up for patient outcomes

**Study subjects:**

ESRD on maintenance hemodialysis.

**Inclusion criteria:**

- CKD aged 18 years or above & who are on maintenance hemodialysis with diabetes and / hypertension and cardiovascular diseases as co morbidity
- Maintenance hemodialysis since > 3 months
- ESRD who consent to be a part of the study

**Exclusion criteria:**

- Patients with severe comorbid diseases such as cerebrovascular disease, mental retardation and psychiatric disorder, malignancy or acquired immunodeficiency disorder
- Those with poor compliance and who had difficulty adhering to the study individual lectures on renal health
- ESRD aged below 18 years
- who do not consent to be a part of the study
- mental illness and unable to communicate
- Transplant patients

**Study duration:** 4 years (2017 to 2021)

**Sample size:**

Cross sectional study:

Expected proportion of ESRD patients having good knowledge on kidney disease as per the pilot study - 20 %

Relative precision – 25 %

Confidence interval – 95%

N= 4pq/d2

Sample size – 171

Adding 10 % non-response final sample size is 285

**Sample size for RCT:**

Knowledge is taken as the primary outcome variable for the computation of sample size. A mean difference of 0.5 SD (moderate effect size) is considered clinically important to consider that the intervention is effective. Assuming a power of 80% and a significance level of 5%, sample size for the comparison of two group means is 64 per group. Adjusting for 20% dropout rate required sample size per group is 80 per group

**
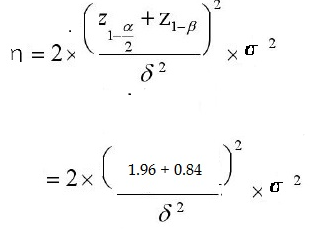
**

**Sample size = 60 + 20 percent drop out = 80 per group**

**Randomization procedure**

Patients with knowledge scores of < 50 % will be randomized for Phase 3 into two groups, i.e. health care provider group administered (I) and control group © using block randomization technique. Block randomization with unequal block sizes of 4 & 6, to minimize selection bias and 1:1 allocation will be done for intervention and control groups. To achieve sample size of 160, we will need 13 blocks of size 4 and 18 blocks of size 6 and there will be 31 blocks in total. Block size sequence will be generated using simple random sampling (e.g. 4, 4, 6, 6, 4, 6, 4, 6, 6). For each block in the sequence, the permutation will be selected using simple random sampling and same will be followed for each of the 31 blocks, as shown in below example:

| **Permutations of groups** | **Block size** |
| --- | --- |
| ICIC/IICC/ICCI/CCII........ | 4 |
| IIICCC/CCIICC/CCCIII……….. | 6 |

In this sequence, 160 opaque enveloped were sealed and arranged and handed over to a third person. Then the selection of the eligible study patients will be according to the envelopes in that sequence, and they will receive the particular intervention.

**Data collection tools**

**Socio-demographic profile:** Baseline characteristics of the participants will be collected using baseline questionnaire which includes socio-demographic characteristics (age, gender, marital status, duration of haemodialysis, distance travelled, motivation to take haemodialysis, living with whom, mode of transmission) & socio-economic status will be assessed using modified. Kuppuswamy scale which has three parameters namely- income, occupation & educational status. GFR, biochemical variables, blood pressure, history of diabetes, comorbid illness, physical activity, medication use and lifestyle.

**ESRD adherence questionnaire:** ESRD level of adherence to diet, medication, haemodialysis, fluid restriction is assessed using ESRD adherence follow-up questionnaire will be collected > Adherence will be measured in proportions, higher the percentage better the adherence interdialytic weight gains, biochemical variables if feasible will be used as adherence indicators.

**Factors influencing adherence to therapeutic regimen** will be assessed using focus group discussion and interview guide.

**Kiks questionnaire:** Knowledge of care chronic kidney disease and hemodialysis will be developed using the KIKS questionnaire, NKF – DOQI guidelines and nutritional knowledge assessment, validated and assessed among the patients.

**Food frequency recall**: will be used to recall 24 hours food frequency, the food consumption of patients to ensure compliance to dietary habits and individualized diet plans will be given.

**Self-inspection tool:** daily health diaries to record body weight, heart rate, blood pressure, respiratory pattern, urinary volume, heart rate and food frequency recall.

**Medical record utilization:** medical record will be utilized to get data on medical service utilization, direct medical costs will be computed based on the service utilization and indirect costs will be calculated from patients. Direct cost includes number of outpatient visit, number of hospitalization time and frequency, length of hospitalization, cost of outpatient service, cost of inpatient service, log cost of inpatient service and log total cost of medical service.

**Patient and staff training records:** patients trained for sessions will be monitored and recorded, staff training records and patient assignment to staff will be maintained.

Focus Group Discussion will also be done to collect additional information on factors influencing adherence and non -adherence among patients on dialysis. MDE educational intervention modules will be developed & validated before implementation.

**OUTCOME MEASURES:**

**Primary outcomes:**

• To assess the effect of educational intervention on knowledge, adherence, medical service utilization and total medical cost.

**Secondary outcomes**:

- To measure the increase in knowledge and adherence regarding care of kidney disease and dialysis care.
- To measure the medical service utilization and cost of medical service utilization.

**DATA ANALYSIS:**

The collected data will be coded, entered and analyzed using SPSS Version 16.

1. For categorical variables (level of adherence, knowledge): Statistical test, Chi-square test will be done.

2. For continuous variables: change in pre & posttest values - Paired t-test & change in values between the groups – Student t-test will be done.

3. Multivariate analysis (Logistic Regression) - factors associated with adherence.

4. P value < 0.05 will be considered as statistically significant.

**DATA ANALYSIS FOR FGDs:**

All FGDs will be audio-recorder & cross-checked with the notes taken during FGDs by the recorder. Responses will be translated to English. The translated responses will be coded according to the domains they will belong & coded responses will be analyzed in consonance with stated objectives of the study.

**ETHICAL CONSIDERATION:**

The study protocol will be submitted to Institutional Ethics Committee (IEC) at Kasturba Medical College, Manipal.

**IMPORTANCE OF THE PROPOSED RESEARCH:**

1. Research - The data obtained may help for further studies in this area. The effectiveness of such an intervention has not been much explored in India. Thus this work will contribute to further research advancements.
2. Quality & effectiveness - The study will help to determine the factors affecting the adherence to therapeutic regimen in this region & will provide strategies to improve the adherence.
3. Policy making - The information generated will provide essential support for the planning policies in the future that can be implemented across India.
4. Sustainability

**Pilot study**

Pilot study will done to assess the knowledge and among ESRD patient on maintenance dialysis Sample size for pilot study was 30, 10 patients in each subgroup.

Patients below 30 days, 31 to 120 days, 120 days and above were the subgroups

**Results of the pilot study:**

Knowledge domains

1. 74.2 % had moderate knowledge on kidney disease and 12.9 % had poor knowledge
2. 9.7% had moderate knowledge and 80.6% had poor knowledge on infection
3. 77.4% had moderate knowledge and 12.9% had poor knowledge on dialysis treatment
4. 9.6% had moderate knowledge and 80.6% had poor knowledge on nutrition
5. 80.6% had moderate knowledge and 9.7% had poor knowledge on fistula care

Association between age and knowledge

- As age increases, knowledge increases, and this is significant. Others were not found significant i.e., knowledge was better among age group 50 and above

Association between education and knowledge

- Knowledge and education nothing significant

Association between income and knowledge

- Knowledge and income not significant

Association of knowledge with type of vascular access

- Those who had higher knowledge on dialysis were the ones with fistula

Knowledge and dialysis days

- Knowledge on dialysis treatment was found to be higher on those people who were on dialysis for more than 3 months

**Table 01: Mean and standard deviation**

|  | | | | | |
| --- | --- | --- | --- | --- | --- |
| Knowledge domain | N | Minimum | Maximum | Mean | Std. Deviation |
| Infection | 31 | 1.00 | 34.00 | 10.2581 | 7.79730 |
| Dialysis treatment | 31 | 2.00 | 18.00 | 7.6129 | 4.22435 |
| Fistula Care | 31 | .00 | 12.00 | 5.2581 | 3.48298 |
| Nutrition | 31 | .00 | 41.00 | 15.2903 | 11.96437 |
| Kidney disease | 30 | 4.00 | 37.00 | 16.6333 | 9.18200 |
|  |  |  |  |  |  |

Overall Mean is 55.2 and standard deviation is 2.293. With intervention there will be a 50% increase i.e., the expected mean would be 82.8 and SD is 3.43.

**Funding and expenses**

**Expenses:**

1. Training cost

2. Workshop cost

3. Printing cost

**Funding:**

1. Applied to department of science and technology

2. G. Shankar trust

3. CSR to NIPRO

**Randomized control trial – open label**

| **BLOCK RANDOMIZATION** |
| --- |

| **ESRD patients (n=160)** |
| --- |

**
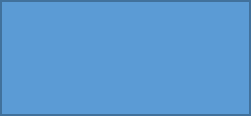
**

CONTROL GROUP

(N=80)

HEALTH CARE PROVDER ADMINISTERED (N=80)

PRETEST FOLLOWED BY STANDARD CARE + FOR 6 MONTHS

PRETEST FOLLOWED BY STANDARD CARE + MDE FOR 6 MONTHS

FIRST POST TEST AT THE END OF 6 MONTHS

FIRST POST TEST AT THE END OF 6 MONTHS

**
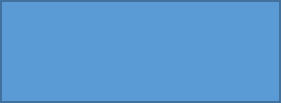
**

PATIENTS WILL BE FOLLOWED-UP NEXT 6 MONTHS & AGAIN SECOND POSTTEST WILL BE DONE AT THE END OF 12TH MONTH FOR STUDY OUTCOMES

PATIENTS WILL BE FOLLOWED-UP NEXT 6 MONTHS & AGAIN SECOND POSTTEST WILL BE DONE AT THE END OF 12TH MONTH FOR STUDY OUTCOMES

**12th month for study outcomes**

**12TH MONTH FOR STUDY OUTCOMES**

**ENTS WILL BE FOLLOWED-UP NEXT 6 MONTHS & AGAIN SECOND POSTTEST WILL BE DONE AT THE END OF 12TH MONTH FOR STUDY OUTCOMES**

**Fig 2. Study Flow Diagram for Phase II:**

**Figure O3: Gantt chart:**

| Study duration | **First year** | | | | **Second year** | | | | **Third year** | | | | **Fourth year** | | | |
| --- | --- | --- | --- | --- | --- | --- | --- | --- | --- | --- | --- | --- | --- | --- | --- | --- |
| Calendar years | 2017-2018 | | | | 2018-2019 | | | | 2019-2020 | | | | 2020-2021 | | | |
| Quarterly years | 1 | 2 | 3 | 4 | 5 | 6 | 7 | 8 | 9 | 10 | 11 | 12 | 13 | 14 | 15 | 16 |
| Review of literature |  |  |  |  |  |  |  |  |  |  |  |  |  |  |  |  |
| Training & course work |  |  |  |  |  |  |  |  |  |  |  |  |  |  |  |  |
| Phase 01  Cross sectional study and FGD |  |  |  |  |  |  |  |  |  |  |  |  |  |  |  |  |
| Module development |  |  |  |  |  |  |  |  |  |  |  |  |  |  |  |  |
| Recruitment and intervention , follow-up |  |  |  |  |  |  |  |  |  |  |  |  |  |  |  |  |
| Intervention phase & follow up |  |  |  |  |  |  |  |  |  |  |  |  |  |  |  |  |
| Data entry |  |  |  |  |  |  |  |  |  |  |  |  |  |  |  |  |
| Data analysis |  |  |  |  |  |  |  |  |  |  |  |  |  |  |  |  |
| Report writing and discussion |  |  |  |  |  |  |  |  |  |  |  |  |  |  |  |  |
| Paper publication  and dissemination |  |  |  |  |  |  |  |  |  |  |  |  |  |  |  |  |

**References**

1. National kidney foundation available on https://www.kidney.org/atoz/content/about-chronic-kidney-disease#ckd
2. Rajapurkar MM, John GT, Kirpalani AL, Abraham G, Agarwal SK, Almeida AF, et al. What do we know about chronic kidney disease in India: First report of the Indian CKD registry. BMC Nephrol.2012;13:10. [[PMC free article](https://www.ncbi.nlm.nih.gov/pmc/articles/PMC3350459/)] [[PubMed](https://www.ncbi.nlm.nih.gov/pubmed/22390203)]
3. Raman R, Ganesan S, Pal SS, et al. Prevalence and risk factors for diabetic retinopathy in rural India. BMJ Open Diabetes Res Care. 2014;2:e0000005. [[PMC free article](https://www.ncbi.nlm.nih.gov/pmc/articles/PMC4212556/)] [[PubMed](https://www.ncbi.nlm.nih.gov/pubmed/25452856)]
4. Wei SY, Chang YY, Mau LW, Lin MY, Chiu HC, et al. (2010) Chronic kidney disease care program improves quality of pre-end-stage renal disease care and reduces medical costs. Nephrology (Carlton) 15: 108–115. [[PubMed](https://www.ncbi.nlm.nih.gov/pubmed/20377778)]
5. Hill et al. Global Prevalence of Chronic Kidney Disease – A Systematic Review and Meta-Analysis. PLoS One. 2016; 11(7): e0158765. Published online 2016 Jul 6. doi: 10.1371/journal.pone.0158765. Available at : <https://www.ncbi.nlm.nih.gov/pmc/articles/PMC4934905/>
6. World Kidney Day: Chronic Kidney Disease. 2015; http://www.worldkidneyday.org/faqs/chronic-kidney-disease/
7. Anand et al. The Gap between Estimated Incidence of End-Stage Renal Disease and Use of Therapy. PLoS One. 2013; 8(8): e72860. Published online 2013 Aug 30. doi: 10.1371/journal.pone.0072860 Available at : https://www.ncbi.nlm.nih.gov/pmc/articles/PMC3758352/Accessed on 20-1-17
8. Modi et al. The incidence of end-stage renal disease in India: a population-based study. Kidney Int. 2006 Dec;70(12):2131-3. Epub 2006 Oct 25. Available at : https://www.ncbi.nlm.nih.gov/pubmed/17063176

Accessed on 20-1-17

1. Varma P.P., Prevalence of chronic kidney disease in India - Where are we heading?. Indian J Nephrol. 2015 May-Jun; 25(3): 133–135
2. Intra –Dialysis Complications among Hemodialysis Patients. - A Case Study . INTERNATIONAL JOURNAL OF PURE & APPLIED BIOSCIENCE; 2 (5): 115-117 (2014) http://www.ijpab.com/form/2014%20Volume%202,%20issue%205/IJPAB-2014-2-5-115-117.pdf
3. [Tarek A. Ghonemy](http://www.sciencedirect.com/science/article/pii/S2090506815000263)[a](http://www.sciencedirect.com/science/article/pii/S2090506815000263#af005) Vascular access complications and risk factors in hemodialysis patients: A single center study. [Alexandria Journal of Medicine](http://www.sciencedirect.com/science/journal/20905068)**.** [Volume 52, Issue 1](http://www.sciencedirect.com/science/journal/20905068/52/1), March 2016, Pages 67–71
4. [Eiam-Ong S](https://www.ncbi.nlm.nih.gov/pubmed/?term=Eiam-Ong%20S%5BAuthor%5D&cauthor=true&cauthor_uid=12197927)1, [Sitprija V](https://www.ncbi.nlm.nih.gov/pubmed/?term=Sitprija%20V%5BAuthor%5D&cauthor=true&cauthor_uid=12197927)2002. Comorbidities in patients with end-stage renal disease in developing countries.Artificial organs DOI: 10.1046/j.1525-1594.2002.07064.x
5. Kopple JD. McCollum Award Lecture, 1996: Protein–energy malnutrition in maintenance hemodialysis patients. Am J Clin Nutr. 1996;65:1544–57. [[PubMed](https://www.ncbi.nlm.nih.gov/pubmed/9129491)]
6. Kalantar-Zadeh K, Ikizler TA, Block G, Avram MM, Kopple JD. Malnutrition–inflammation complex syndrome in dialysis patients: Causes and consequence. Am J Kidney Dis. 2003;42:864–81. [[PubMed](https://www.ncbi.nlm.nih.gov/pubmed/14582032)]
7. Self-Care Ability in Hemodialysis Patients [Internet]. pubmed. 2012 [cited 3 February 2017]. Available from: <https://www.ncbi.nlm.nih.gov/pmc/articles/PMC4166685>
8. Lincemon L. Effectiveness of a Nurse -Led Program Regarding Self Care Management among Hemodialysis Patients [Internet]. http://www.ijhsr.org/IJHSR_Vol.5_Issue.6_June2015/58.pdf. 2017 [cited 21 March 2017]. Available from: <http://www.ijhsr.org/IJHSR_Vol.5_Issue.6_June2015/58.pdf>
9. Impact of Knowledge, Attitude and Behavior among Maintenance Hemodialysis Patients for Adherence to Dietary Regimen – A Single Centre Experience [Internet]. International Journal of Humanities and Social Science. 2017 [cited 21 March 2017]. Available from: <http://www.ijhssnet.com/journals/Vol_4_No_12_October_2014/29.pdf>
10. Study to assess knowledge on self-care among patients on HD, Punjab , 2014 [Internet]. 1st ed. international research journal; 2017 [cited 22 March 2017]. Available from: <http://irj.iars.info/volumes/828002012012/pdf/828002012012021.pdf>
11. Joellen Carroll F. The effect of diet education on the laboratory values and knowledge of hemodialysis patients with hyperphosphatemia. Journal of Renal Nutrition [Internet]. 2017 [cited 21 March 2017];Volume 14, Issue 1, January 2004,. Available from http://www.sciencedirect.com/science/article/pii/S1051227603001419
12. Ghannadi S, Amouzegar A, Amiri P, Karbalaeifar R, Tahmasebinejad Z, Kazempour-Ardebili S. Evaluating the Effect of Knowledge, Attitude, and Practice on Self-Management in Type 2 Diabetic Patients on Dialysis. Journal of Diabetes Research. 2016;2016:1-7.
13. Adherence of chronic renal insufficiency patients to hemodialysis. Acta paul enferm vol23 no4 São Paulo 2010. 2017;.
14. <https://www.jscimedcentral.com/Nursing/nursing-3-1061.pdf-> Self Care Knowledge among Chronic Kidney Disease Patients Undergoing Maintenance Hemodialysis
15. Self-Care Ability in Hemodialysis Patients [Internet]. pubmed. 2012 [cited 3 February 2017]. Available from: https://www.ncbi.nlm.nih.gov/pmc/articles/PMC4166685/
16. Schatell D, Witten B. Measuring Dialysis Patients’ Health-Related Quality of Life with the KDQOL-36TM. Medical Education Institute, Inc. (608) 833-8033, KDQOL COMPLETE. 2012. Available from:[http://www.kdqol-complete.org.](http://www.kdqol-complete.org./)

25 .Mapes DL, Bragg-Gresham JL, Bommer J, Fukuhara S, McKevitt P, Wikström B, Lopes AA. Health-related quality of life in the Dialysis Outcomes and Practice Patterns Study (DOPPS) Am J Kidney Dis. 2004;44:54–60. [[PubMed](https://www.ncbi.nlm.nih.gov/pubmed/15486875)]

26. Kopple JD. McCollum Award Lecture, 1996: Protein–energy malnutrition in maintenance hemodialysis patients. Am J Clin Nutr. 1996;65:1544–57. [[PubMed](https://www.ncbi.nlm.nih.gov/pubmed/9129491)]

1. Kalantar-Zadeh K, Ikizler TA, Block G, Avram MM, Kopple JD. Malnutrition–inflammation complex syndrome in dialysis patients: Causes and consequence. Am J Kidney Dis. 2003;42:864–81. [[PubMed](https://www.ncbi.nlm.nih.gov/pubmed/14582032)]
2. Kopple JD. McCollum Award Lecture, 1996: Protein–energy malnutrition in maintenance hemodialysis patients. Am J Clin Nutr. 1996;65:1544–57. [[PubMed](https://www.ncbi.nlm.nih.gov/pubmed/9129491)]
3. Systematic review by mason https ://www.ncbi.nlm.nih.gov/pubmed/18440681
4. Ahamadi F, Bosorgmehr R, Razeghi E. Relationship between serum leptin level and laboratory and anthropometric indices of malnutrition in patients on hemodialysis. Indian J Nephrol 2008; 18:105-1
5. Protein energy wasting in chronic kidney disease: An update with focus on nutritional interventions to improve outcomes. [Internet]. 2017 [cited 4 February 2017]. Available from: <https://www.ncbi.nlm.nih.gov/pmc/articles/PMC3313743/>
6. Sontakke S, Budania R, Bajait C, Jaiswal K, Pimpalkhute S. Evaluation of adherence to therapy in patients of chronic kidney disease. Indian Journal of Pharmacology. 2015;47(6):668.
7. Contributing Factors to Non-Adherence among Chronic Kidney Disease (CKD) Patients: A Systematic Review of Literature [Internet]. 2017 [cited 3 February 2017]. Available from: 16. <http://medical-clinical-reviews.imedpub.com/contributing-factors-to-nonadherence-among-chronic-kidney-disease-ckdpatients-a-systematic-review-of-literature.php?aid=17499>
8. Effect of an Educational Program on Adherence to Therapeutic Regimen among Chronic Kidney Disease Stage5 (CKD5) Patients under Maintenance Hemodialysis [Internet]. 1st ed. 2017 [cited 4 February 2017]. Available from: http://files.eric.ed.gov/fulltext/EJ1083638.pdf
9. Chen P, Lai T, Chen P, Lai C, Yang S, Wu V et al. Multidisciplinary Care Program for Advanced Chronic Kidney Disease: Reduces Renal Replacement and Medical Costs. The American Journal of Medicine. 2015;128(1):68-76.
10. Yu, Yu-Jen et al. "Multidisciplinary Predialysis Education Reduced The Inpatient And Total Medical Costs Of The First 6 Months Of Dialysis In Incident Hemodialysis Patients". PLoS ONE 9.11 (2014): e112820. Web.
11. Lee W, Campoy S, Smits G, Vu Tran Z, Chonchol M. Effectiveness of a chronic kidney disease clinic in achieving K/DOQI guideline targets at initiation of dialysis--a single-centre experience. Nephrology Dialysis Transplantation. 2007;22(3):833-838.
12. Bayliss E, Bhardwaja B, Ross C, Beck A, Lanese D. Multidisciplinary Team Care May Slow the Rate of Decline in Renal Function. Clinical Journal of the American Society of Nephrology. 2011;6(4):704-710.
13. Dhurata G. http://konferenca.unishk.edu.al/icrae2013/icraecd2013/doc/291.pdf [Internet]. 1st ed. 2017 [cited 22 March 2017]. Available from: <http://konferenca.unishk.edu.al/icrae2013/icraecd2013/doc/291.pdf>
14. Direct Costs Associated With Chronic Kidney Disease Among Type 2 Diabetic Patients In India". Indian journal of nephrology 2014 May-Jun; 24(3): 141–147 (2017):
15. ARORA, PRADEEP et al. "Hospital Utilization Among Chronic Dialysis Patients". Jasn.asnjournals.org. N.p., 2017. Web. 23 Mar. 2017.
16. Damien, Paul et al. "Assessing Key Cost Drivers Associated With Caring For Chronic Kidney Disease Patients". BMC Health Services Research 16.1 (2016): Web.
17. Economic Evaluation Of Haemodialysis. Analysis Of Cost Components Based On Patient-Specific Data". Revistanefrologia.com. N.p., 2017. Web. 23 Mar. 2017.
18. Parthasarathi, G et al. "An Assessment Of The Quality Of Life In Hemodialysis Patients Using The WHOQOL-BREF Questionnaire". Indian Journal of Nephrology 18.4 (2008): 141. Web.
19. Sharma, Seema et al. "Evaluation Of Impact Of Counseling On Quality Of Life Of Chronic Kidney Disease And Hemodialysis Patients". Ijopp.org. N.p., 2017. Web. 23 Mar. 2017.
